# Supplementary material for: Sources of variation in cell-type RNA-Seq profiles
Source: PubMed Central journal article supplement (PMC7505444; doi:10.1371/journal.pone.0239495), 2020-09-21
Supplement: pone.0239495.s001.pdf [file pone.0239495.s001.pdf]

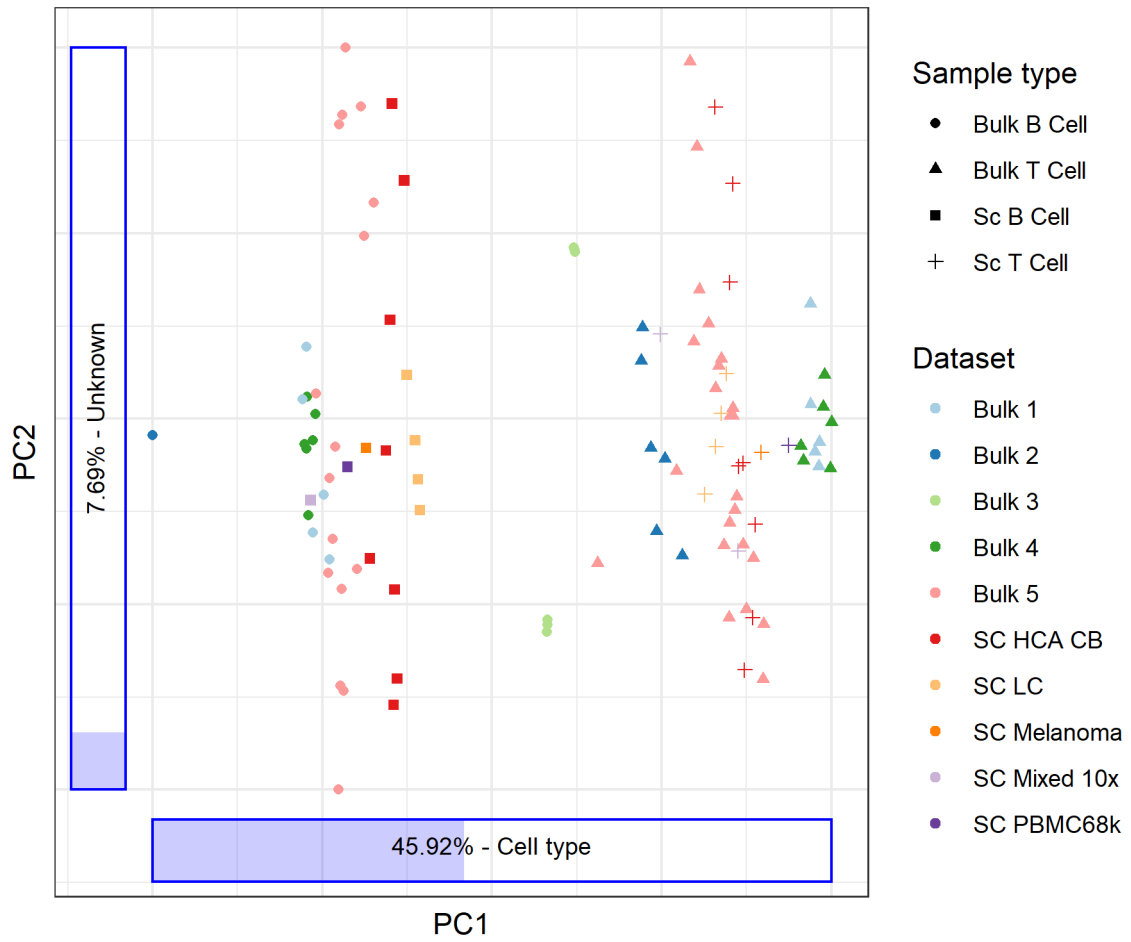

**S1 Fig. PCA of batch corrected data using ComBat where cell type is not specified in the design matrix.**
