# Supplementary material for: Sources of variation in cell-type RNA-Seq profiles
Source: PubMed Central journal article supplement (PMC7505444; doi:10.1371/journal.pone.0239495), 2020-09-21
Supplement: pone.0239495.s008.pdf [file pone.0239495.s008.pdf]

**S2 Table.** The number of cells used for each single-cell profile pair used in figure 7 in the main text.

| <b>Profile</b>       | <b>No. B Cells</b> | <b>No. T Cells</b> |
|----------------------|--------------------|--------------------|
| Pooled SC HCA CB     | 35,910             | 167,612            |
| Pooled SC LC         | 4,806              | 23,170             |
| SC PBMC68k           | 5,908              | 48,657             |
| SC Melanoma          | 512                | 2,040              |
| SC LC Tumor          | 4,509              | 18,306             |
| SC LC Healthy Tissue | 297                | 4,864              |
| SC HCA CB            | 35,910             | 167,612            |
