# Supplementary material for: Sources of variation in cell-type RNA-Seq profiles
Source: PLoS One. 2020 Sep 21;15(9):e0239495. doi: 10.1371/journal.pone.0239495 (PMC7505444; doi:10.1371/journal.pone.0239495)
Supplement: S1 Table — (XLSX) [file pone.0239495.s007.xlsx]

## Sheet: DesignMatrix
		ENCODE												FANTOM5												ENCODE	BLUEPRINT
	Sample Index	1	2	3	4	5	6	7	8	9	10	11	12	13	14	15	16	17	18	19	20	21	22	23	24	25	26	27	28	29	30	31	32	33	34	35	36	37	38	39	40	41	42	43	44	45	46	47	48
	Lab	2	3	3	3	3	3	3	2	2	2	2	2	4	4	4	4	4	4	4	4	4	4	4	4	2	5	5	5	5	5	5	5	5	5	5	5	5	5	5	5	5	5	5	5	5	5	5	5
	Tissue	1	1	1	1	1	1	1	1	1	1	1	1	1	1	1	1	1	1	1	1	1	1	1	1	1	2	2	1	2	1	1	1	1	1	1	1	2	2	1	3	3	4	1	4	1	4	1	1
	Bulk=1, Smart-Seq2 = 2	1	1	1	1	1	1	1	1	1	1	1	1	1	1	1	1	1	1	1	1	1	1	1	1	1	1	1	1	1	1	1	1	1	1	1	1	1	1	1	1	1	1	1	1	1	1	1	1
	Same Individual	2	4	4	4	5	5	5	6	2	2	2	2	1	1	1	3	3	3	1	1	1	3	3	3	6
	Sub Cell type	0	0	0	0	0	0	0	2	3	1	1	2	0	0	0	0	0	0	1	1	1	1	1	1	3	2	2	0	0	3	3	3	3	3	3	3	3	3	3	2	4	0	0	0	0	0	0	5
	Cell type B=1	1	1	1	1	1	1	1	2	2	2	2	2	1	1	1	1	1	1	2	2	2	2	2	2	2	2	2	1	1	2	2	2	2	2	2	2	2	2	2	2	2	1	1	1	1	1	1	2
	Technical Replicates		1	1	1	2	2	2			3	3
[truncated: 57 more columns]

## Sheet: CellTypes
1	B cell
2	T cell

## Sheet: Sample info
Sample index	Source	Id	Cell type	No. Cells	Description	Original files
1	ENCODE	ENCBS010LQV	B-Cells		male adult (37 years) B-cell primary cell, John Stamatoyannopoulos	ENCFF652AIR-1.fastq.gz, ENCFF209TGG-2.fastq.gz
2	ENCODE	ENCLB555APR	B-Cells		female adult (43 years) B primary cell, 3 assumed technical replicates, Thomas Gingeras, CSHL	ENCFF000ESP-1.fastq.gz, ENCFF000ESV-2.fastq.gz
3	ENCODE	ENCLB555APR	B-Cells		technical replicate of above	ENCFF000ESQ-1.fastq.gz, ENCFF000ESW-2.fastq.gz
4	ENCODE	ENCLB555APR	B-Cells		technical replicate of above	ENCFF000ESR-1.fastq.gz, ENCFF000ESY-2.fastq.gz
5	ENCODE	ENCLB555AUP	B-Cells		female adult (27 years) B primary cell, 3 assumed technical replicates, Thomas Gingeras, CSHL	ENCFF000ESM-1.fastq.gz, ENCFF000ESS-2.fastq.gz
6	ENCODE	ENCLB555AUP	B-Cells		technical replicate of above	ENCFF000ESN-1.fastq.gz, ENCFF000EST-2.fastq.gz
7	ENCODE	ENCLB555AUP	B-Cells		technical replicate of above	ENCFF000ESO-1.fastq.gz, ENCFF000ESU-2.fastq.gz
8	ENCODE	ENCBS312SQY	T-Cells		male adult (21 year) CD8-positive, alpha-beta T primary cell, John Stamatoyannopoulos	ENCFF158OUQ-1.fastq.gz, ENCFF214MGP-2.fastq.gz
9	ENCODE	ENCBS473JVM	T-Cells		male adult (37 years) CD4-positive, alpha-beta T primary cell, John Stamatoyannopoulos	ENCFF249TVM-1.fastq.gz, ENCFF570NFU-2.fastq.gz
10	ENCODE	ENCBS495KDC	T-Cells		male adult (37 years) T-cell primary cell, two technical replicates, John Stamatoyannopoulos	ENCFF041PMF-1.fastq.gz, ENCFF738CFT-2.fastq.gz
11	ENCODE	ENCBS495KDC	T-Cells		technical replicate of above	ENCFF429CDV-1.fastq.gz, ENCFF684RDZ-2.fastq.gz
12	ENCODE	ENCBS714KQF, ENCFF088DIY	T-Cells		male adult (37 years) CD8+ T-cell primary cell, John Stamatoyannopoulos	ENCFF442UGX-1.fastq.gz, ENCFF556DET-2.fastq.gz
13	FANTOM5		B-Cells		B cells, 3 samples from the same patient, FANTOM5	CD19%2b%20B%20Cells%20%28pluriselect%29%2c%20donor090309%2c%20donation2.RDhi10008.12194-129B7.hg19.nobarcode.fq
14	FANTOM5		B-Cells			CD19%2b%20B%20Cells%20%28pluriselect%29%2c%20donor090309%2c%20donation1.RDhi10007.12189-129B2.hg19.nobarcode.fq
15	FANTOM5		B-Cells			CD19%2b%20B%20Cells%20%28pluriselect%29%2c%20donor090309%2c%20donation3.RDhi10009.12199-129C3.hg19.nobarcode.fq
16	FANTOM5		B-Cells		B cells, 3 samples from the same patient, FANTOM5	CD19%2b%20B%20Cells%20%28pluriselect%29%2c%20donor090612%2c%20donation1.RDhi10010.12204-129C8.hg19.nobarcode.fq
17	FANTOM5		B-Cells			CD19%2b%20B%20Cells%20%28pluriselect%29%2c%20donor090612%2c%20donation2.RDhi10011.12209-129D4.hg19.nobarcode.fq
18	FANTOM5		B-Cells			CD19%2b%20B%20Cells%20%28pluriselect%29%2c%20donor090612%2c%20donation3.RDhi10012.12214-129D9.hg19.nobarcode.fq
19	FANTOM5		T-Cells		T cells, 3 samples from the same patient, FANTOM5	CD8%2b%20T%20Cells%20%28pluriselect%29%2c%20donor090309%2c%20donation1.RDhi10014.12186-129A8.hg19.nobarcode.fq
20	FANTOM5		T-Cells			CD8%2b%20T%20Cells%20%28pluriselect%29%2c%20donor090309%2c%20donation2.RDhi10015.12191-129B4.hg19.nobarcode.fq
21	FANTOM5		T-Cells			CD8%2b%20T%20Cells%20%28pluriselect%29%2c%20donor090309%2c%20donation3.RDhi10016.12196-129B9.hg19.nobarcode.fq
22	FANTOM5		T-Cells		T cells, 3 samples from the same patient, FANTOM5	CD8%2b%20T%20Cells%20%28pluriselect%29%2c%20donor090612%2c%20donation1.RDhi10017.12201-129C5.hg19.nobarcode.fq
23	FANTOM5		T-Cells			CD8%2b%20T%20Cells%20%28pluriselect%29%2c%20donor090612%2c%20donation2.RDhi10018.12206-129D1.hg19.nobarcode.fq
24	FANTOM5		T-Cells			CD8%2b%20T%20Cells%20%28pluriselect%29%2c%20donor090612%2c%20donation3.RDhi10019.12211-129D6.hg19.nobarcode.fq
25	ENCODE	ENCBS424MFE	T-Cells		male adult (21 year) CD4-positive, alpha-beta T primary cell, John Stamatoyannopoulos	ENCFF861MLB-1.fastq.gz, ENCFF141XOX-2.fastq.gz
26	BLUEPRINT	EGAD00001001137, S00C2F11	T-Cells		RNA-Seq for CD8-positive, alpha-beta T cell, cord blood	EGAR00001137340_130919_SN546_0217_B_C2GFPACXX_CTTGTA_1_read1.fastq.gz, EGAR00001137340_130919_SN546_0217_B_C2GFPACXX_CTTGTA_1_read2.fastq.gz
27	BLUEPRINT	EGAD00001001137, C0066P12	T-Cells		RNA-Seq for CD8-positive, alpha-beta T cell, cord blood	EGAR00001219222_140618_SN935_0195_A_C42K0ACXX_ACAGTG_2_read1.fastq.gz, EGAR00001219222_140618_SN935_0195_A_C42K0ACXX_ACAGTG_2_read2.fastq.gz
28	BLUEPRINT	EGAD00001001145, C001NBB1	B-Cells		CD38-negative naive B cell	s_120913_6.ATTCCT.read1.fastq.gz, s_120913_6.ATTCCT.read1.fastq.gz
29	BLUEPRINT	EGAD00001001145, C005MY12	B-Cells		CD38-negative naive B cell	130214_SN935_0147_B_D1T9CACXX_AGTCAA_7_read1.fastq.gz, 130214_SN935_0147_B_D1T9CACXX_AGTCAA_7_read2.fastq.gz
30	BLUEPRINT	EGAD00001001173, S008H111	T-Cells		RNA-Seq for CD4-positive, alpha-beta T cell	140618_SN935_0195_A_C42K0ACXX_ACTGAT_3_read1.fastq.gz, 140618_SN935_0195_A_C42K0ACXX_ACTGAT_3_read2.fastq.gz
31	BLUEPRINT	EGAD00001001173, S002EV11	T-Cells		RNA-Seq for CD4-positive, alpha-beta T cell	140814_SN546_0249_A_C48WMACXX_ACTGAT_3_read1.fastq.gz, 140814_SN546_0249_A_C48WMACXX_ACTGAT_3_read2.fastq.gz
32	BLUEPRINT	EGAD00001001173, S0041C11	T-Cells		RNA-Seq for CD4-positive, alpha-beta T cell	140814_SN546_0249_A_C48WMACXX_ACAGTG_2_read1.fastq.gz, 140814_SN546_0249_A_C48WMACXX_ACAGTG_2_read2.fastq.gz
33	BLUEPRINT	EGAD00001001173, C001FRB1	T-Cells		RNA-Seq for CD4-positive, alpha-beta T cell	s_120913_5.GCCAAT.read1.fastq.gz, s_120913_5.GCCAAT.read2.fastq.gz
34	BLUEPRINT	EGAD00001001173, S007G711	T-Cells		RNA-Seq for CD4-positive, alpha-beta T cell	140618_SN935_0195_A_C42K0ACXX_GATCAG_5_read1.fastq.gz, 140618_SN935_0195_A_C42K0ACXX_GATCAG_5_read2.fastq.gz
35	BLUEPRINT	EGAD00001001173, S004M711	T-Cells		RNA-Seq for CD4-positive, alpha-beta T cell	140814_SN546_0249_A_C48WMACXX_GTGAAA_2_read1.fastq.gz, 140814_SN546_0249_A_C48WMACXX_GTGAAA_2_read2.fastq.gz
36	BLUEPRINT	EGAD00001001173, S007DD11	T-Cells		RNA-Seq for CD4-positive, alpha-beta T cell	140618_SN935_0195_A_C42K0ACXX_ATCACG_4_read1.fastq.gz, 140618_SN935_0195_A_C42K0ACXX_ATCACG_4_read2.fastq.gz
37	BLUEPRINT	EGAD00001001173, S0018A13	T-Cells		RNA-Seq for CD4-positive, alpha-beta T cell	140814_SN546_0249_A_C48WMACXX_GTCCGC_3_read1.fastq.gz, 140814_SN546_0249_A_C48WMACXX_GTCCGC_3_read2.fastq.gz
38	BLUEPRINT	EGAD00001001173, S000RD15	T-Cells		RNA-Seq for CD4-positive, alpha-beta T cell	130919_SN546_0217_B_C2GFPACXX_GCCAAT_1_read1.fastq.gz, 130919_SN546_0217_B_C2GFPACXX_GCCAAT_1_read2.fastq.gz
39	BLUEPRINT	EGAD00001001173, S009W411	T-Cells		RNA-Seq for CD4-positive, alpha-beta T cell	140618_SN935_0195_A_C42K0ACXX_CTTGTA_1_read1.fastq.gz, 140618_SN935_0195_A_C42K0ACXX_CTTGTA_1_read2.fastq.gz
40	BLUEPRINT	EGAD00001001478	T-Cells		RNA-Seq for CD8-positive, alpha-beta thymocyte, on genome GRCh38	141030_SN935_0211_B_C5R24ACXX_GTCCGC_3_read1.fastq.gz, 141030_SN935_0211_B_C5R24ACXX_GTCCGC_3_read2.fastq.gz
41	BLUEPRINT	EGAD00001001483	T-Cells		RNA-Seq for CD3-negative, CD4-positive, CD8-positive, double positive thymocyte, on genome GRCh38	141030_SN935_0211_B_C5R24ACXX_ACAGTG_1_read1.fastq.gz, 141030_SN935_0211_B_C5R24ACXX_ACAGTG_1_read2.fastq.gz
42	BLUEPRINT	EGAD00001002315, S019EW11	B-Cells		RNA-Seq for naive B cell, on genome GRCh38	150616_SN546_0278_B_C794GACXX_ACTTGA_2_read1.fastq.gz, 150616_SN546_0278_B_C794GACXX_ACTTGA_2_read2.fastq.gz
43	BLUEPRINT	EGAD00001002315, S019KK11	B-Cells		RNA-Seq for naive B cell, on genome GRCh38	150616_SN546_0278_B_C794GACXX_AGTTCC_5_read1.fastq.gz, 150616_SN546_0278_B_C794GACXX_AGTTCC_5_read2.fastq.gz
44	BLUEPRINT	EGAD00001002315, S01NDF11	B-Cells		RNA-Seq for naive B cell, on genome GRCh38	151008_SN935_0021_A_C7ANWACXX_TGACCA_5_read1.fastq.gz, 151008_SN935_0021_A_C7ANWACXX_TGACCA_5_read2.fastq.gz
45	BLUEPRINT	EGAD00001002315, S019JM11	B-Cells		RNA-Seq for naive B cell, on genome GRCh38	150616_SN546_0278_B_C794GACXX_GGCTAC_3_read1.fastq.gz, 150616_SN546_0278_B_C794GACXX_GGCTAC_3_read2.fastq.gz
46	BLUEPRINT	EGAD00001002315, S01GJV11	B-Cells		RNA-Seq for naive B cell, on genome GRCh38	150922_SN935_0020_B_C788LACXX_AGTCAA_8_read1.fastq.gz, 150922_SN935_0020_B_C788LACXX_AGTCAA_8_read2.fastq.gz
47	BLUEPRINT	EGAD00001002315, S019HQ11	B-Cells		RNA-Seq for naive B cell, on genome GRCh38	150616_SN546_0278_B_C794GACXX_TTAGGC_1_read1.fastq.gz, 150616_SN546_0278_B_C794GACXX_TTAGGC_1_read2.fastq.gz
48	BLUEPRINT	EGAD00001002320	T-Cells		RNA-Seq for effector memory CD8-positive, alpha-beta T cell, terminally differentiated, on genome GRCh38	151008_SN935_0021_A_C7ANWACXX_AGTCAA_3_read1.fastq.gz, 151008_SN935_0021_A_C7ANWACXX_AGTCAA_3_read2.fastq.gz
49	BLUEPRINT	EGAD00001002347	B-Cells		RNA-Seq for memory B cell, on genome GRCh38	s_120913_7.GTCCGC.read1.fastq.gz, s_120913_7.GTCCGC.read2.fastq.gz
50	BLUEPRINT	EGAD00001002349, C001FRB3	T-Cells		RNA-Seq for central memory CD4-positive, alpha-beta T cell, on genome GRCh38	s_120913_5.GTGGCC.read1.fastq.gz, s_120913_5.GTGGCC.read2.fastq.gz
51	BLUEPRINT	EGAD00001002349, S014QS11	T-Cells		RNA-Seq for central memory CD4-positive, alpha-beta T cell, on genome GRCh38	150415_SN546_0275_A_H9A87ADXX_GTGAAA_2_read1.fastq.gz, 150415_SN546_0275_A_H9A87ADXX_GTGAAA_2_read2.fastq.gz
52	BLUEPRINT	EGAD00001002351	T-Cells		RNA-Seq for regulatory T cell, on genome GRCh38	s_120913_4.TAGCTT.read1.fastq.gz, s_120913_4.TAGCTT.read2.fastq.gz
53	BLUEPRINT	EGAD00001002414	B-Cells		RNA-Seq for unswitched memory B cell, on genome GRCh38	150616_SN546_0278_B_C794GACXX_GATCAG_1_read1.fastq.gz, 150616_SN546_0278_B_C794GACXX_GATCAG_1_read2.fastq.gz
54	BLUEPRINT	EGAD00001002452, S019FU11	B-Cells		RNA-Seq for germinal center B cell, on genome GRCh38	150616_SN546_0278_B_C794GACXX_CTTGTA_6_read1.fastq.gz, 150616_SN546_0278_B_C794GACXX_CTTGTA_6_read2.fastq.gz
55	BLUEPRINT	EGAD00001002452, S013AR11	B-Cells		RNA-Seq for germinal center B cell, on genome GRCh38	150616_SN546_0278_B_C794GACXX_CAGATC_3_read1.fastq.gz, 150616_SN546_0278_B_C794GACXX_CAGATC_3_read2.fastq.gz
56	BLUEPRINT	EGAD00001002452, S00Y9O11	B-Cells		RNA-Seq for germinal center B cell, on genome GRCh38	150616_SN546_0278_B_C794GACXX_GCCAAT_6_read1.fastq.gz, 150616_SN546_0278_B_C794GACXX_GCCAAT_6_read2.fastq.gz
57	BLUEPRINT	EGAD00001002456, C001HNB3	T-Cells		RNA-Seq for effector memory CD8-positive, alpha-beta T cell, on genome GRCh38	s_120913_4.CGATGT.read1.fastq.gz, s_120913_4.CGATGT.read2.fastq.gz
58	BLUEPRINT	EGAD00001002456, S014TM11	T-Cells		RNA-Seq for effector memory CD8-positive, alpha-beta T cell, on genome GRCh38	150603_SN935_0017_A_C73GHACXX_ACAGTG_5_read1.fastq.gz, 150603_SN935_0017_A_C73GHACXX_ACAGTG_5_read2.fastq.gz
59	BLUEPRINT	EGAD00001002469, S014QS12	T-Cells		RNA-Seq for effector memory CD4-positive, alpha-beta T cell, on genome GRCh38	150415_SN546_0275_A_H9A87ADXX_ACTGAT_1_read1.fastq.gz, 150415_SN546_0275_A_H9A87ADXX_ACTGAT_1_read2.fastq.gz
60	BLUEPRINT	EGAD00001002469, C001FRB4	T-Cells		RNA-Seq for effector memory CD4-positive, alpha-beta T cell, on genome GRCh38	s_120913_5.CTTGTA.read1.fastq.gz, s_120913_5.CTTGTA.read2.fastq.gz
61	BLUEPRINT	EGAD00001002476, S01TDS11	B-Cells		RNA-Seq for class switched memory B cell, on genome GRCh38	151008_SN935_0021_A_C7ANWACXX_TGACCA_2_read1.fastq.gz, 151008_SN935_0021_A_C7ANWACXX_TGACCA_2_read2.fastq.gz
62	BLUEPRINT	EGAD00001002476, C001NBB4	B-Cells		RNA-Seq for class switched memory B cell, on genome GRCh38	s_120913_7.ACTGAT.read1.fastq.gz, s_120913_7.ACTGAT.read2.fastq.gz
63	BLUEPRINT	EGAD00001002476, S019MG11	B-Cells		RNA-Seq for class switched memory B cell, on genome GRCh38	150616_SN546_0278_B_C794GACXX_GTGAAA_4_read1.fastq.gz, 150616_SN546_0278_B_C794GACXX_GTGAAA_4_read2.fastq.gz
64	BLUEPRINT	EGAD00001002482	T-Cells		RNA-Seq for central memory CD8-positive, alpha-beta T cell, on genome GRCh38	s_120913_4.AGTCAA.read1.fastq.gz, s_120913_4.AGTCAA.read2.fastq.gz
65	GSE 51984	B01	B-Cells		We don't have the fastq files for these samples
66	GSE 51984	B02	B-Cells
67	GSE 51984	B03	B-Cells
68	GSE 51984	B04	B-Cells
69	GSE 51984	B05	B-Cells
70	GSE 51984	T01	T-Cells
71	GSE 51984	T02	T-Cells
72	GSE 51984	T03	T-Cells
73	GSE 51984	T04	T-Cells
74	GSE 51984	T05	T-Cells
75	HCA CB	CB1T	T-Cells	10154
76	HCA CB	CB2T	T-Cells	24384
77	HCA CB	CB3T	T-Cells	30574
78	HCA CB	CB4T	T-Cells	15605
79	HCA CB	CB5T	T-Cells	21959
80	HCA CB	CB6T	T-Cells	22371
81	HCA CB	CB7T	T-Cells	24549
82	HCA CB	CB8T	T-Cells	18016
83	HCA CB	CB1B	B-Cells	2194
84	HCA CB	CB2B	B-Cells	5774
85	HCA CB	CB3B	B-Cells	2003
86	HCA CB	CB4B	B-Cells	4782
87	HCA CB	CB5B	B-Cells	4764
88	HCA CB	CB6B	B-Cells	4849
89	HCA CB	CB7B	B-Cells	7896
90	HCA CB	CB8B	B-Cells	3648
91	LC	LCPat3T	T-Cells	3600	From tumor
92	LC	LCPat4T	T-Cells	8171	From tumor
93	LC	LCPat5T	T-Cells	4870	From tumor
94	LC	LCPat3B	B-Cells	850	From tumor
95	LC	LCPat4B	B-Cells	1061	From tumor
96	LC	LCPat5B	B-Cells	2145	From tumor
97	LC	LCHT	T-Cells	4864	From healthy tissue
98	LC	LCHB	B-Cells	297	From healthy tissue
99	PBMC68k	PBMC68kT	T-Cells	48657
100	PBMC68k	PBMC68kB	B-Cells	5908
101	TCD4MEM	TCD4MEM	T-Cells, CD4+ memory	10224	FACS-sorted
102	B10k	B10k	B-Cells	10085	FACS-sorted
103	TCD8	TCD8	T-Cells, CD8+	5662	FACS-sorted
104	MEL	MELT	T-Cells	2040	Smart-Seq2
105	MEL	MELB	B-Cells	512	Smart-Seq2

## Sheet: Tissue
1	Blood
2	Cord blood
3	Thymus
4	Tonsil
5	Lung
6	Lung cancer
7	Melanoma

## Sheet: Labs
1	Pabst, Sauvageau (GSE 51984)
2	ENCODE: John Stamatoyannopoulos, Zhiping Weng, UMass
3	ENCODE: Gingeras
4	FANTOM 5
5	Blueprint	Unclear if this is several labs or not
6	Pooled single-cell, Cord blood, Human Cell Atlas
7	Pooled single-cell, Lung cancer, 10x data, Lambrechts et al
8	Pooled single-cell, 68k PBMC, 10x data
9	Pooled single-cell, PBMC, 10x data
10	Pooled single-cell, Tirosh et al, Melanoma, SmartSeq2

## Sheet: SubCellType
0	Mix B cell
1	Mix T cell
2	CD8+ T cell
3	CD4+ T cell
4	CD3-, CD4+, CD8+ T cell
5	Effector memory CD8+ T cell
6	Memory B Cell
7	Central memory CD4+ T cell
8	T-Reg
9	Unswitched memory B cell
10	Effector memory CD4+ T cell
11	Class switched memory B cell
12	Central memory CD8+ T cell
