# Supplementary material for: Sources of variation in cell-type RNA-Seq profiles
Source: PLOS journal article supplement (doi:10.1371/journal.pone.0239495), 2020-09-21
Supplement: S5 (10.1371/journal.pone.0239495.s005) [file journal.pone.0239495.s005]

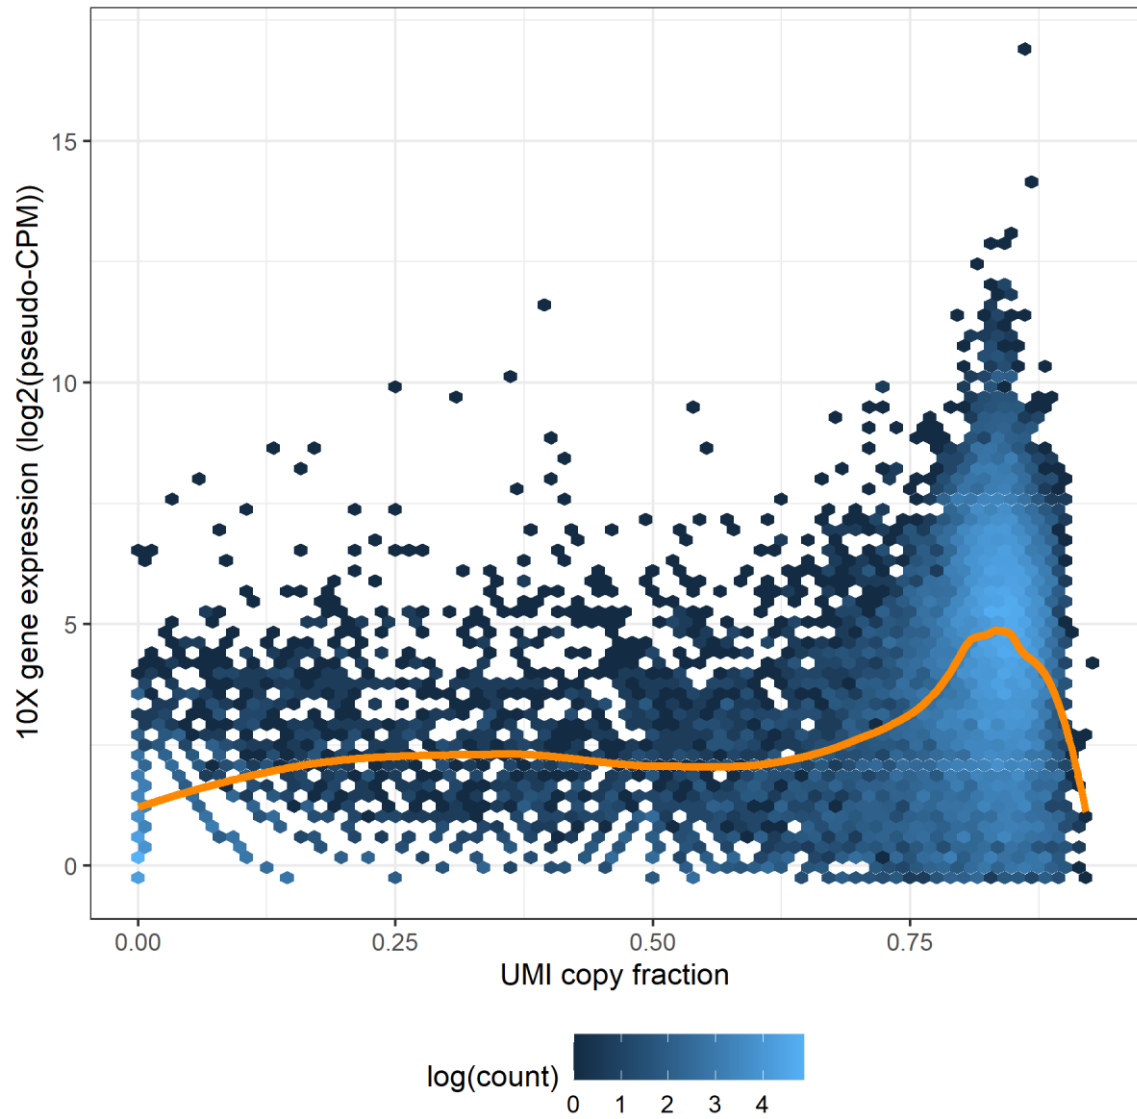

**Fig. S5. Average gene expression per gene vs the UMICF covariate.** The figure presents data from the EVAL dataset, Cortex 1, 10x single-cell data, normalized using TMM. Only genes with 5 molecules or more is shown.
